# Supplementary material
Source: publisher site journal article supplement (https://www.degruyterbrill.com/publication/isbn/9783110316131/downloadAsset/9783110316131_Inhaltsverzeichnis.pdf)
Supplement: Supplementary file 1 [file 9783110316131_Inhaltsverzeichnis.pdf]

# Inhaltsübersicht

|                                 |    |
|---------------------------------|----|
| Abkürzungsverzeichnis . . . . . | IX |
|---------------------------------|----|

## AKTIENGESETZ

### ZWEITES BUCH

#### KOMMANDITGESELLSCHAFT AUF AKTIEN

§§ 278–290

### DRITTES BUCH

#### VERBUNDENE UNTERNEHMEN

##### Erster Teil

##### Unternehmensverträge

|                          |                                                                                         |            |
|--------------------------|-----------------------------------------------------------------------------------------|------------|
| <i>Erster Abschnitt</i>  | Arten von Unternehmensverträgen . . . . .                                               | §§ 291–292 |
| <i>Zweiter Abschnitt</i> | Abschluß, Änderung und Beendigung von Unternehmensverträgen . . . . .                   | §§ 293–299 |
| <i>Dritter Abschnitt</i> | Sicherung der Gesellschaft und der Gläubiger .                                          | §§ 300–303 |
| <i>Vierter Abschnitt</i> | Sicherung der außenstehenden Aktionäre bei Beherrschungs- und Gewinnabführungsverträgen | §§ 304–307 |

##### Zweiter Teil

##### Leitungsmacht und Verantwortlichkeit bei Abhängigkeit von Unternehmen

|                         |                                                                                         |            |
|-------------------------|-----------------------------------------------------------------------------------------|------------|
| <i>Erster Abschnitt</i> | Leitungsmacht und Verantwortlichkeit bei Bestehen eines Beherrschungsvertrags . . . . . | §§ 308–310 |
|-------------------------|-----------------------------------------------------------------------------------------|------------|
